# Supplementary material for: β-hydroxybutyrate does not alter the effects of glucose deprivation on breast cancer cells
Source: PubMed Central journal article supplement — Oncol Lett. 2020 Nov 23;21(1):65. doi: 10.3892/ol.2020.12326 (PMC7709568; doi:10.3892/ol.2020.12326), 2020-11-23
Supplement: Supplementary_Data.pdf [file Supplementary_Data.pdf]

Figure S1. Cell proliferation in (A) T47D breast cancer cells, (B) MCF-7 breast cancer cells and (C) MCF-10A breast epithelial cells after treatment with BHB,  $\beta$ -hydroxybutyrate. Line graphs indicate means of two independent experiments with standard deviation. \*Indicate significant difference from the control (0 mM BHB). Significant levels: \* $P < 0.05$ ; \*\* $P < 0.01$ ; \*\*\* $P < 0.001$ .

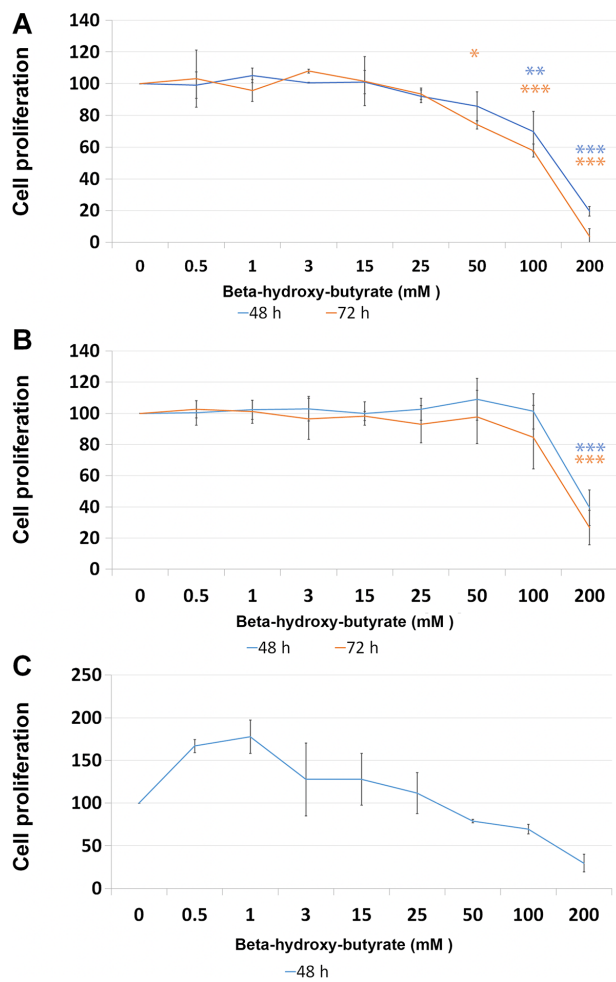

Table SI. Expression of enzymes responsible for ketone body catabolism in MCF-7 and T47D breast cancer cells.

## A, MCF-7 cells glucose 100%\_0 mM BHB vs. glucose 5%\_0 mM BHB

| Results                           | OXCT1     | OXCT2    | ACAT1    | ACAT2    | BDH1     |
|-----------------------------------|-----------|----------|----------|----------|----------|
| log2FoldChange                    | -5.63E-04 | 2.03E-03 | 1.67E-02 | 1.10E-01 | 1.27E-02 |
| Mean FPKM (glucose 100%_0 mM BHB) | 11.27     | 0.15     | 12.24    | 30.66    | 20.64    |
| Mean FPKM (glucose 5%_0 mM BHB)   | 10.92     | 0.23     | 15.70    | 40.83    | 26.79    |
| P-adjusted value                  | 1.00      | 1.00     | 1.00     | 1.00     | 1.00     |

## B, MCF-7 cells glucose 5%\_0 mM BHB vs. glucose 5%\_10 mM BHB

| Results                          | OXCT1     | OXCT2     | ACAT1     | ACAT2     | BDH1     |
|----------------------------------|-----------|-----------|-----------|-----------|----------|
| log2FoldChange                   | -2.53E-04 | -2.20E-05 | -8.91E-05 | -3.23E-04 | 6.76E-05 |
| Mean FPKM (glucose 5%_0 mM BHB)  | 10.92     | 0.23      | 15.70     | 40.83     | 26.79    |
| Mean FPKM (glucose 5%_10 mM BHB) | 10.04     | 0.22      | 15.17     | 38.21     | 27.39    |
| P-adjusted value                 | 1.00      | 1.00      | 1.00      | 1.00      | 1.00     |

## C, MCF-7 cells glucose 5%\_0 mM BHB vs. glucose 5%\_25 mM BHB

| Results                          | OXCT1     | OXCT2     | ACAT1     | ACAT2     | BDH1      |
|----------------------------------|-----------|-----------|-----------|-----------|-----------|
| log2FoldChange                   | -8.62E-04 | -5.14E-05 | -1.10E-03 | -7.76E-04 | -2.29E-04 |
| Mean FPKM (glucose 5%_0 mM BHB)  | 10.92     | 0.23      | 15.70     | 40.83     | 26.79     |
| Mean FPKM (glucose 5%_25 mM BHB) | 8.34      | 0.19      | 12.61     | 35.48     | 25.50     |
| P-adjusted value                 | 1.00      | 1.00      | 1.00      | 1.00      | 1.00      |

## D, T47D cells glucose 100%\_0 mM BHB vs. glucose 5%\_0 mM BHB

| Results                           | OXCT1     | OXCT2     | ACAT1    | ACAT2     | BDH1     |
|-----------------------------------|-----------|-----------|----------|-----------|----------|
| log2FoldChange                    | -6.61E-02 | -8.53E-02 | 2.49E-01 | -4.93E-01 | 1.20E-01 |
| Mean FPKM (glucose 100%_0 mM BHB) | 1.49      | 0.25      | 81.49    | 35.01     | 39.35    |
| Mean FPKM (glucose 5%_0 mM BHB)   | 1.34      | 0.14      | 99.09    | 23.47     | 43.88    |
| P-adjusted value                  | 1.00      | 1.00      | 1.00     | 0.51      | 1.00     |

## E, T47D cells glucose 5%\_0 mM BHB vs. glucose 5%\_10 mM BHB

| Results                          | OXCT1     | OXCT2    | ACAT1    | ACAT2     | BDH1      |
|----------------------------------|-----------|----------|----------|-----------|-----------|
| log2FoldChange                   | -5.29E-05 | 1.02E-05 | 6.02E-05 | -2.90E-04 | -2.01E-04 |
| Mean FPKM (glucose 5%_0 mM BHB)  | 1.34      | 0.14     | 99.09    | 23.47     | 43.88     |
| Mean FPKM (glucose 5%_10 mM BHB) | 1.18      | 0.15     | 97.11    | 20.17     | 38.57     |
| P-adjusted value                 | 1.00      | 1.00     | 1.00     | 1.00      | 1.00      |

## F, T47D cells glucose 5%\_0 mM BHB vs. glucose 5%\_25 mM BHB

| Results                          | OXCT1    | OXCT2    | ACAT1     | ACAT2     | BDH1      |
|----------------------------------|----------|----------|-----------|-----------|-----------|
| log2FoldChange                   | 3.63E-03 | 6.37E-04 | -6.81E-03 | -8.05E-02 | -3.17E-02 |
| Mean FPKM (glucose 5%_0 mM BHB)  | 1.34     | 0.14     | 99.09     | 23.47     | 43.88     |
| Mean FPKM (glucose 5%_25 mM BHB) | 1.49     | 0.17     | 90.19     | 17.60     | 34.76     |
| P-adjusted value                 | 1.00     | 1.00     | 1.00      | 1.00      | 1.00      |

FPKM, fragments per kilobase of transcript per million mapped reads; OXCT, 3-oxoacid CoA-transferase; ACAT, acetyl-CoA acetyltransferase; BDH, 3-hydroxybutyrate dehydrogenase; BHB,  $\beta$ -hydroxybutyrate.

Table SII. Co-expression of OXCT1 and BDH in TCGA patient samples.

| Gene 1 | Gene 2 | Neither | Gene 1 not<br>Gene 2 | Gene 2 not<br>Gene 1 | Both | Log2 odds ratio | P-value | Tendency      |
|--------|--------|---------|----------------------|----------------------|------|-----------------|---------|---------------|
| OXCT1  | OXCT2  | 9640    | 347                  | 178                  | 24   | 1.905           | <0.001  | Co-occurrence |
| BDH2   | OXCT1  | 9768    | 50                   | 358                  | 13   | 2.827           | <0.001  | Co-occurrence |
| BDH1   | OXCT1  | 9258    | 560                  | 324                  | 47   | 1.262           | <0.001  | Co-occurrence |
| BDH1   | OXCT2  | 9407    | 580                  | 175                  | 27   | 1.323           | <0.001  | Co-occurrence |
| BDH2   | OXCT2  | 9930    | 57                   | 196                  | 6    | 2.415           | 0.001   | Co-occurrence |
| BDH1   | BDH2   | 9528    | 598                  | 54                   | 9    | 1.409           | 0.012   | Co-occurrence |

OXCT, 3-oxoacid CoA-transferase; BDH, 3-hydroxybutyrate dehydrogenase; TCGA, The Cancer Genome Atlas.
